# Supplementary material for: Highly efficient inverted polymer solar cells using fullerene derivative modified TiO2 nanorods as the buffer layer
Source: Royal Society of Chemistry journal article supplement (doi:10.1039/c4ra02254h), 2014-01-01
Supplement: c4ra02254h1.pdf [file c4ra02254h1.pdf]

## Supplementary Information

# Highly efficient inverted polymer solar cells using fullerene derivative modified TiO<sub>2</sub> nanorods as the buffer layer

*Chunming Sun,<sup>ab</sup> Xiaodong Li,<sup>b</sup> Guojie Wang,<sup>b</sup> Pandeng Li,<sup>b</sup> Wenjun Zhang,<sup>b</sup> Tonggang Jiu,<sup>b</sup>  
Nianquan Jiang<sup>\*a</sup> and Junfeng Fang<sup>\*b</sup>*

<sup>a</sup> College of Physics & Electronic Information Engineering, Wenzhou University, Wenzhou  
325035, China

<sup>b</sup> Ningbo Institute of Materials Technology and Engineering, Chinese Academy of Sciences,  
Ningbo, 315201, China

\*Corresponding author: fangjf@nimte.ac.cn, jiangnq@wzu.edu.cn

## Experimental section

### *Reagent and Materials.*

The ITO-coated glass substrates were provided by CSG HOLDING CO. PTB7 was purchased from 1-material Chemscitech and PC<sub>71</sub>BM was purchased from American Dye Source, Inc. CPTA, Chlorobenzene, 1,8-diiodoctane were purchased by Sigma-Aldrich. The Titanium tetraisopropoxide (TTIP) was obtained from J&K Scientific Ltd. Methanol, oleic acid, pyridine and chloroform were purchased from Sinopharm Chemical Reagent Co. All the chemicals were used as received without further purification.

### *Synthesis of TiO<sub>2</sub> NRs and Ligand Exchange.*

Anatase TiO<sub>2</sub> NRs were synthesized according to the previously reported method.<sup>1</sup> The obtained TiO<sub>2</sub> NRs surface are usually attached with insulating ligands of oleic acid (OA), which prevent the aggregation of TiO<sub>2</sub> NRs. Original OA ligands on TiO<sub>2</sub> NRs surface were partially replaced by pyridine to enhance charge transport.<sup>2, 3</sup> The as-synthesized TiO<sub>2</sub> NRs were precipitated by methanol for 3 times. Then the precipitant was re-dispersed in pyridine (5ml, AR) in an ultrasonic homogenizer. The TiO<sub>2</sub> NRs/pyridine solution was then kept at 78°C with stirring for 4h till the solution turned clear. Finally, the excess hexane was used for precipitating the TiO<sub>2</sub> NRs at room temperature and washing out the unabsorbed surface modifiers. The resulting precipitates were isolated by centrifugation. Then, these pyridine coated-TiO<sub>2</sub> NRs were re-dispersed in chloroform for device fabrication.

### *Device Fabrication.*

PSCs were fabricated by the following procedure. The patterned ITO substrates were cleaned by ultrasonic processing in detergent, deionized water, acetone, and isopropyl alcohol. The chloroform solution of TiO<sub>2</sub> NRs was deposited on the ITO substrates with 1500 rpm for 40s and annealed at 150°C for 15 min in the air. The thickness of bare TiO<sub>2</sub> film was 30 nm. Then the methanol solution of CPTA with different concentration was spin casted on TiO<sub>2</sub> films. The active layer solution of PTB7:PC<sub>71</sub>BM in mixed solvent of chlorobenzene/1,8-diiodoctane (97:3 vol%) at a 10:15 weight ratio was spin casted at 1500 rpm for 120s on top of the buffer layer.<sup>4</sup> Finally, the devices were pumped down to a ca.  $1 \times 10^{-6}$  mbar pressure, and a ca. 10 nm of MoO<sub>3</sub> and a ca. 100 nm of Al film were deposited on top of the active layer as the anode through a shadow mask to obtain the active area of 2×2 mm<sup>2</sup>.

#### *Characterization and Measurement.*

The current density-voltage ( $J$ - $V$ ) characteristics of the PSCs were recorded by a Keithley 2400 source meter under exposure to an AM 1.5 Global solar simulator with an intensity of 100 mW cm<sup>-2</sup>. The EQE measurements were taken by the Newport IQE-200 Measurement System, which was equipped with a monochromator, a Xe lamp, a lock-in amplifier, and a current-voltage preamplifier. The surface height images of the samples were obtained by atomic force microscope (AFM). AFM was operated using a Veeco dimension V atomic microscope in tapping mode at room temperature. The water contact angle measurements were performed by dropping deionized water using Contact Angle System OCA-20.

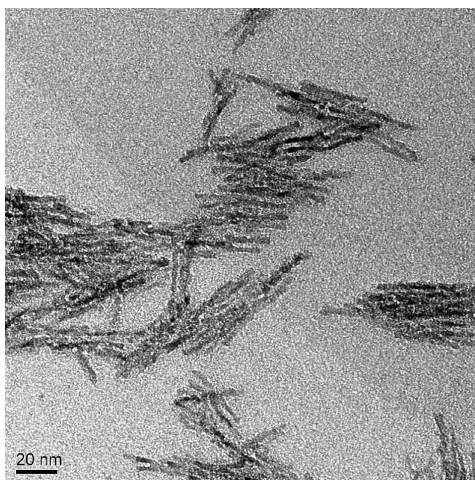

**Figure S1.** TEM image of TiO<sub>2</sub> nanorods.

**Table S1.** Specific devices parameters based on TiO<sub>2</sub> NRs modified with the different concentrations of CPTA as the buffer layer in PTB7:PC<sub>71</sub>BM blends.

| Concentration | $V_{oc}$ | $J_{sc}$               | $FF$ | $\eta$ | $R_s$                    | $R_{sh}$                 |
|---------------|----------|------------------------|------|--------|--------------------------|--------------------------|
| (mg/ml)       | [V]      | [mA cm <sup>-2</sup> ] | [%]  | [%]    | $\Omega$ cm <sup>2</sup> | $\Omega$ cm <sup>2</sup> |
| 0             | 0.758    | 14.69                  | 69.6 | 7.75   | 5.24                     | 1021                     |
| 0.5           | 0.757    | 15.73                  | 73.5 | 8.74   | 3.88                     | 1567                     |
| 0.7           | 0.757    | 15.49                  | 72.2 | 8.47   | 4.52                     | 1336                     |
| 1             | 0.750    | 15.48                  | 71.4 | 8.29   | 5.60                     | 1148                     |

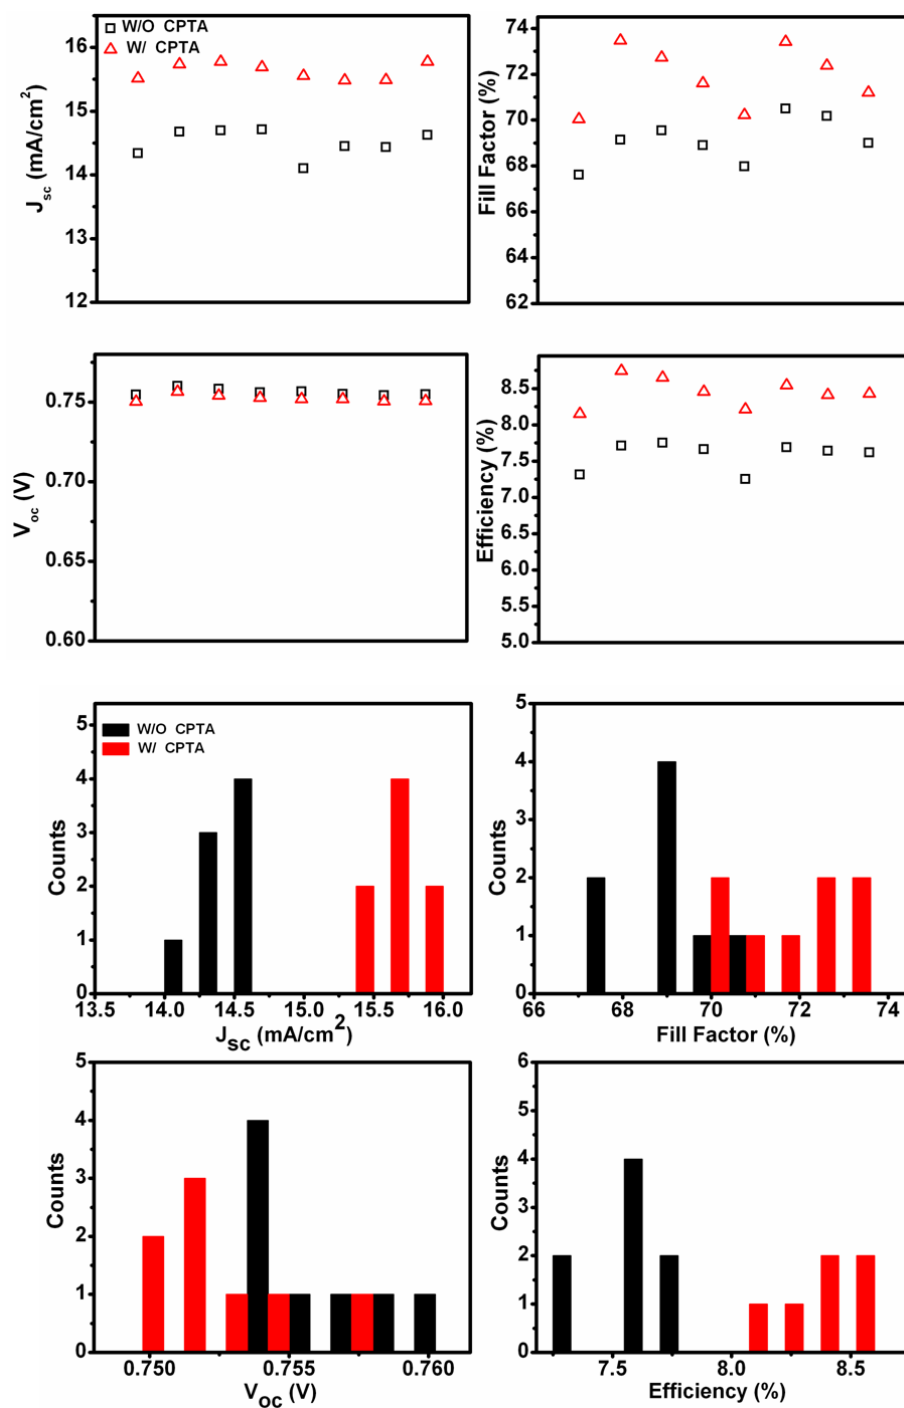

**Figure S2.** The device parameter distribution maps using bare  $\text{TiO}_2$  or CPTA-modified  $\text{TiO}_2$  as the buffer layer in PSCs.

1. P. D. Cozzoli, A. Kornowski and H. Weller, *J. Am. Chem. Soc.*, 2003, **125**, 14539-14548.
2. J.-F. Lin, G.-Y. Tu, C.-C. Ho, C.-Y. Chang, W.-C. Yen, S.-H. Hsu, Y.-F. Chen and W.-F. Su, *Appl. Mater. Interfaces*, 2013, **5**, 1009-1016.
3. S.-S. Li, C.-P. Chang, C.-C. Lin, Y.-Y. Lin, C.-H. Chang, J.-R. Yang, M.-W. Chu and C.-W. Chen, *J. Am. Chem. Soc.*, 2011, **133**, 11614-11620.
4. Z. He, C. Zhong, S. Su, M. Xu, H. Wu and Y. Cao, *Nat Photon.*, 2012, **6**, 593-597.
